# Supplementary material
Source: Springer Nature journal article supplement (https://www.springermedizin.de/resource/supplementary/12879_2010_1898_MOESM11_ESM.pdf/9443984)

Response

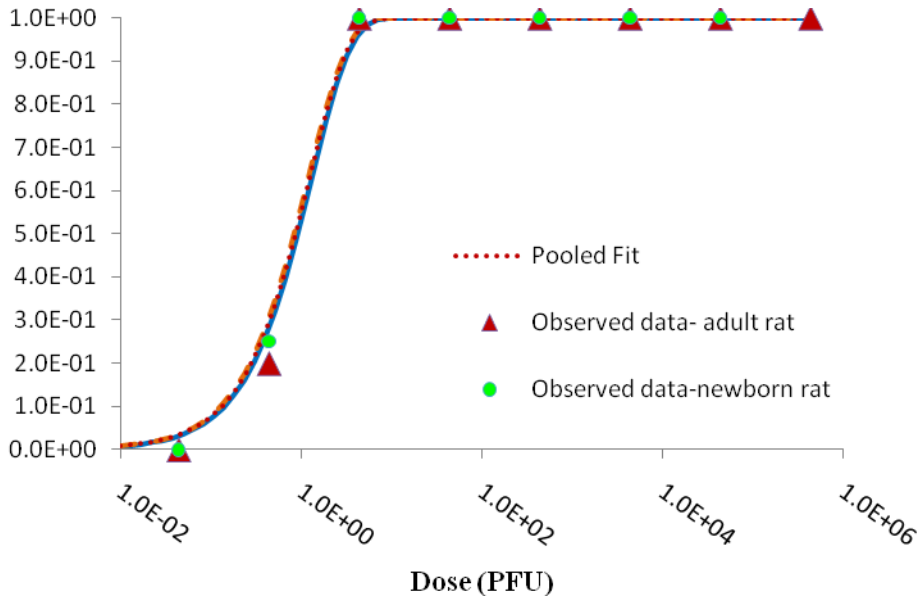

Supplement: MOESM11 [file 9443984]
